# Supplementary material for: The slack test does not assess maximal shortening velocity of muscle fascicle in human
Source: Oxford University Press journal article supplement (doi:10.1242/jeb.169623), 2018-01-01
Supplement: jeb169623supp.pdf [file jeb169623supp.pdf]

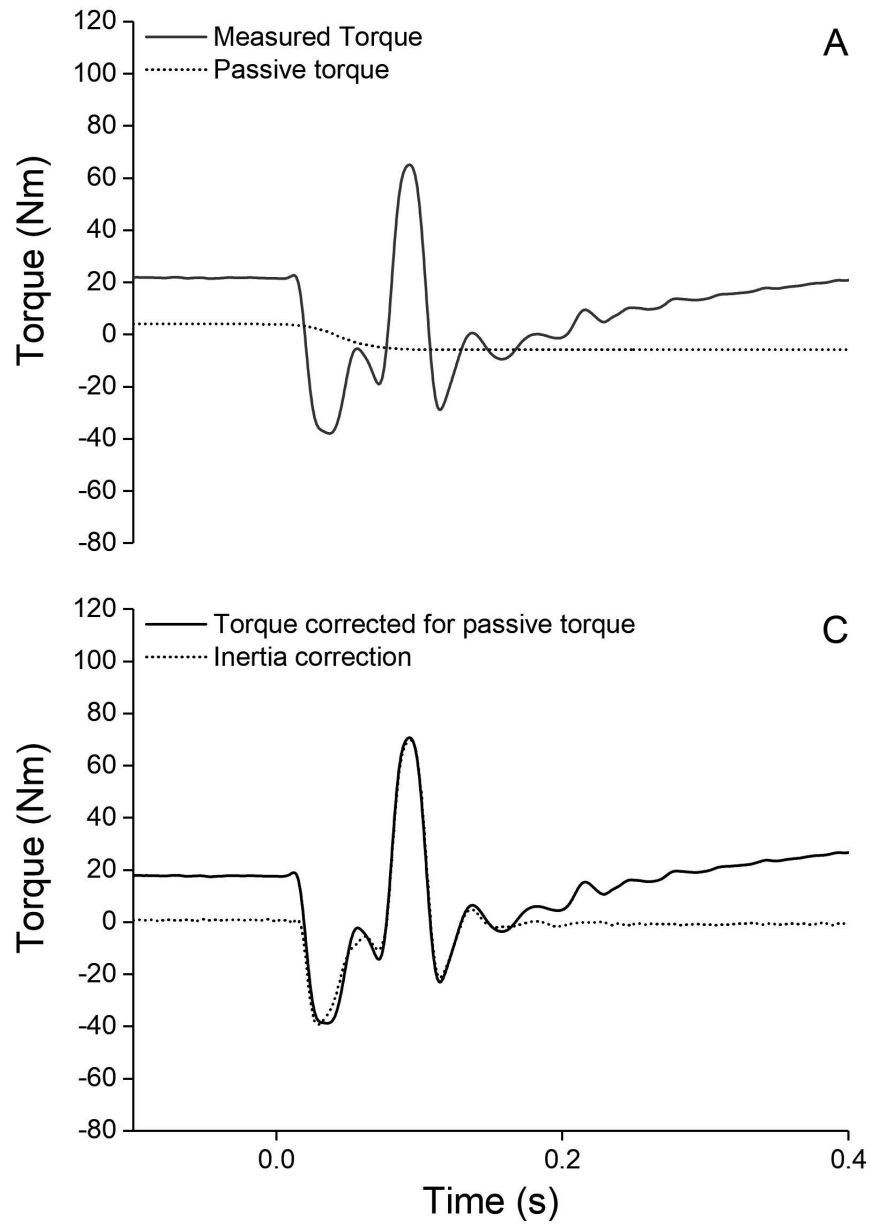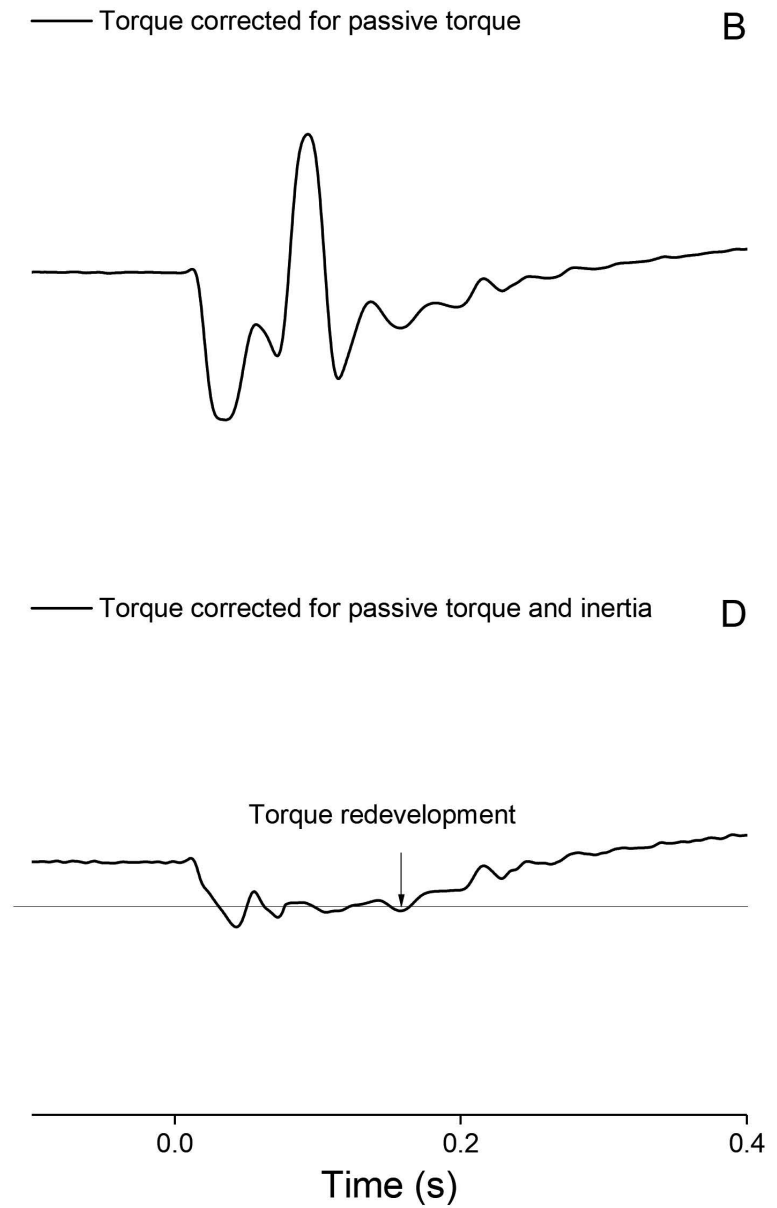

Fig. S1. (A) Measured torque and torque measured during passive cycle passive (as a function of angular rotation). First, torque was corrected with the subtraction of passive torque (B). Second, inertia correction was performed according to previous model used by De Zee and al., 2001 (C). Third, inertia correction was deducted from torque corrected for passive torque (D). Time to torque redevelopment was defined as the moment where torque corrected for passive torque and inertia increase above 0 Nm.
